# Supplementary material for: Kinetic and Microhydrodynamic Modeling of Fenofibrate Nanosuspension Production in a Wet Stirred Media Mill
Source: MDPI journal article supplement (doi:10.3390/pharmaceutics13071055), 2021-07-10
Supplement: s1 [file s1]

# Supplementary Materials: Kinetic and Microhydrodynamic Modeling of Fenofibrate Nanosuspension Production in a Wet Stirred Media Mill

Gulenay Guner, Dogacan Yilmaz and Ecevit Bilgili

**Table S1.** Average stirrer power per unit volume  $P_w$ , apparent shear viscosity  $\mu_L$  and density  $\rho_L$  of the milled drug suspensions as well as the calculated microhydrodynamic parameters for the wet milling experiments.

| Run no. | $P_w$ (W/m <sup>3</sup> ) | $\mu_L$ (mPa·s) <sup>a</sup> | $\rho_L$ (kg/m <sup>3</sup> ) | $\theta \times 10^3$ (m <sup>2</sup> /s <sup>2</sup> ) | $u_b$ (m/s) | $\nu$ (kHz) | $\sigma_b^{\max}$ (GPa) | $\alpha_b$ (μm) | $a$ (mHz) | $\Pi\sigma_y$ (J <sup>2</sup> /m <sup>6</sup> s) |
|---------|---------------------------|------------------------------|-------------------------------|--------------------------------------------------------|-------------|-------------|-------------------------|-----------------|-----------|--------------------------------------------------|
| 1       | 2.81×10 <sup>5</sup>      | 160                          | 1030                          | 1.28                                                   | 0.06        | 2.15        | 1.84×10 <sup>-2</sup>   | 3.82            | 15.9      | 1.90×10 <sup>12</sup>                            |
| 2       | 8.65×10 <sup>5</sup>      | 119                          | 1030                          | 4.32                                                   | 0.10        | 4.32        | 1.58                    | 2.41            | 16.7      | 2.73×10 <sup>16</sup>                            |
| 3       | 4.90×10 <sup>5</sup>      | 118                          | 1030                          | 0.74                                                   | 0.04        | 5.60        | 1.65×10 <sup>-2</sup>   | 3.42            | 61.7      | 4.55×10 <sup>12</sup>                            |
| 4       | 9.48×10 <sup>5</sup>      | 57.4                         | 1030                          | 2.35                                                   | 0.08        | 10.9        | 1.40                    | 2.13            | 61.5      | 6.05×10 <sup>16</sup>                            |
| 5       | 1.03×10 <sup>6</sup>      | 144                          | 1020                          | 5.15                                                   | 0.11        | 4.31        | 2.43×10 <sup>-2</sup>   | 5.04            | 55.5      | 1.16×10 <sup>13</sup>                            |
| 6       | 1.49×10 <sup>6</sup>      | 67.4                         | 1030                          | 12.4                                                   | 0.18        | 7.31        | 1.94                    | 2.97            | 43.9      | 1.07×10 <sup>17</sup>                            |
| 7       | 1.16×10 <sup>6</sup>      | 81.0                         | 1030                          | 2.50                                                   | 0.08        | 10.3        | 2.11×10 <sup>-2</sup>   | 4.37            | 185       | 2.22×10 <sup>13</sup>                            |
| 8       | 2.49×10 <sup>6</sup>      | 32.5                         | 1030                          | 9.53                                                   | 0.16        | 22.0        | 1.85                    | 2.82            | 217       | 3.73×10 <sup>17</sup>                            |
| 9       | 5.31×10 <sup>5</sup>      | 113                          | 1030                          | 1.77                                                   | 0.07        | 4.44        | 1.97×10 <sup>-2</sup>   | 4.07            | 51.2      | 6.17×10 <sup>12</sup>                            |
| 10      | 1.45×10 <sup>6</sup>      | 57.6                         | 1030                          | 7.29                                                   | 0.14        | 9.86        | 1.75                    | 2.67            | 64.5      | 1.15×10 <sup>17</sup>                            |
| 11      | 1.15×10 <sup>5</sup>      | 174                          | 1030                          | 0.78                                                   | 0.04        | 1.15        | 1.67×10 <sup>-2</sup>   | 3.46            | 5.50      | 5.83×10 <sup>11</sup>                            |
| 12      | 5.31×10 <sup>5</sup>      | 123                          | 1030                          | 4.08                                                   | 0.10        | 2.88        | 1.56                    | 2.38            | 8.57      | 1.48×10 <sup>16</sup>                            |

<sup>a</sup>Taken at the shear rate  $\dot{\gamma}$  of 1000 1/s.

**Table S2.** Statistics of the estimated MLRM coefficients, including the intercept, correlating the breakage rate constant  $k$  of the  $n$ th-order kinetic model to the microhydrodynamic parameters.

| Fit                                | Parameter                                                           |                          |                       | Model          |                    |       |                       |
|------------------------------------|---------------------------------------------------------------------|--------------------------|-----------------------|----------------|--------------------|-------|-----------------------|
|                                    | Symbol <sup>a</sup>                                                 | Coefficient <sup>b</sup> | $p$ -Value            | R <sup>2</sup> | Adj R <sup>2</sup> | SSR   | $p$ -Value            |
| First-order MLRM, BM <sub>2</sub>  | Intercept (μm <sup>(n-1)</sup> min <sup>-1</sup> )                  | 1.44×10 <sup>-1</sup>    | 1.76×10 <sup>-1</sup> | 0.828          | 0.799              | 0.182 | 1.72×10 <sup>-3</sup> |
|                                    | $a$ (mHz)                                                           | 4.65×10 <sup>-3</sup>    | 1.72×10 <sup>-3</sup> |                |                    |       |                       |
| First-order MLRM, BM <sub>3</sub>  | Intercept (μm <sup>(n-1)</sup> min <sup>-1</sup> )                  | 6.15×10 <sup>-1</sup>    | 3.65×10 <sup>-3</sup> | 0.963          | 0.948              | 0.039 | 2.61×10 <sup>-4</sup> |
|                                    | $\alpha_b$ (μm)                                                     | -1.44×10 <sup>-1</sup>   | 7.80×10 <sup>-3</sup> |                |                    |       |                       |
|                                    | $a$ (mHz)                                                           | 4.85×10 <sup>-3</sup>    | 1.08×10 <sup>-4</sup> |                |                    |       |                       |
| First-order MLRM, BM <sub>4</sub>  | Intercept (μm <sup>(n-1)</sup> min <sup>-1</sup> )                  | 5.49×10 <sup>-1</sup>    | 1.96×10 <sup>-2</sup> | 0.969          | 0.945              | 0.033 | 1.82×10 <sup>-3</sup> |
|                                    | $\alpha_b$ (μm)                                                     | -1.23×10 <sup>-1</sup>   | 4.76×10 <sup>-2</sup> |                |                    |       |                       |
|                                    | $a$ (mHz)                                                           | 4.43×10 <sup>-3</sup>    | 2.79×10 <sup>-3</sup> |                |                    |       |                       |
|                                    | $\Pi\sigma_y$ (×10 <sup>-16</sup> J <sup>2</sup> /m <sup>6</sup> s) | 3.66×10 <sup>-3</sup>    | 4.46×10 <sup>-1</sup> |                |                    |       |                       |
| First-order MLRM, BM <sub>5</sub>  | Intercept (μm <sup>(n-1)</sup> min <sup>-1</sup> )                  | 5.43×10 <sup>-1</sup>    | 1.53×10 <sup>-1</sup> | 0.969          | 0.927              | 0.033 | 1.36×10 <sup>-2</sup> |
|                                    | $\sigma_b^{\max}$ (GPa)                                             | 1.37×10 <sup>-3</sup>    | 9.82×10 <sup>-1</sup> |                |                    |       |                       |
|                                    | $\alpha_b$ (μm)                                                     | -1.21×10 <sup>-1</sup>   | 1.72×10 <sup>-1</sup> |                |                    |       |                       |
|                                    | $a$ (mHz)                                                           | 4.44×10 <sup>-3</sup>    | 1.28×10 <sup>-2</sup> |                |                    |       |                       |
|                                    | $\Pi\sigma_y$ (×10 <sup>-16</sup> J <sup>2</sup> /m <sup>6</sup> s) | 3.55×10 <sup>-3</sup>    | 6.24×10 <sup>-1</sup> |                |                    |       |                       |
| Second-order MLRM, BM <sub>4</sub> | Intercept (μm <sup>(n-1)</sup> min <sup>-1</sup> )                  | 5.50×10 <sup>-1</sup>    | 1.00×10 <sup>-2</sup> | 0.975          | 0.956              | 0.026 | 1.16×10 <sup>-3</sup> |
|                                    | $\alpha_b$ (μm)                                                     | -1.56×10 <sup>-1</sup>   | 8.26×10 <sup>-3</sup> |                |                    |       |                       |
|                                    | $a$ (mHz)                                                           | 8.05×10 <sup>-3</sup>    | 2.64×10 <sup>-2</sup> |                |                    |       |                       |
|                                    | $a^2$ (mHz <sup>2</sup> )                                           | -1.35×10 <sup>-5</sup>   | 2.39×10 <sup>-1</sup> |                |                    |       |                       |
| Second-order MLRM, BM <sub>5</sub> | Intercept (μm <sup>(n-1)</sup> min <sup>-1</sup> )                  | 3.65×10 <sup>-1</sup>    | 1.98×10 <sup>-2</sup> | 0.995          | 0.989              | 0.005 | 8.36×10 <sup>-4</sup> |
|                                    | $\alpha_b$ (μm)                                                     | -1.16×10 <sup>-1</sup>   | 9.76×10 <sup>-3</sup> |                |                    |       |                       |
|                                    | $a$ (mHz)                                                           | 9.23×10 <sup>-3</sup>    | 4.92×10 <sup>-3</sup> |                |                    |       |                       |
|                                    | $\Pi\sigma_y$ (×10 <sup>-16</sup> J <sup>2</sup> /m <sup>6</sup> s) | 7.85×10 <sup>-3</sup>    | 3.85×10 <sup>-2</sup> |                |                    |       |                       |

|                                     |                                                                                        |                        |                       |       |       |       |                       |
|-------------------------------------|----------------------------------------------------------------------------------------|------------------------|-----------------------|-------|-------|-------|-----------------------|
|                                     | $a^2$ (mHz <sup>2</sup> )                                                              | $-2.28 \times 10^{-2}$ | $2.70 \times 10^{-2}$ |       |       |       |                       |
| MLRM with interaction terms, $BM_4$ | <b>Intercept</b> ( $\mu\text{m}^{(n-1)}\text{min}^{-1}$ )                              | $7.11 \times 10^{-2}$  | $1.37 \times 10^{-1}$ |       |       |       |                       |
|                                     | $a$ (mHz)                                                                              | $1.63 \times 10^{-2}$  | $1.68 \times 10^{-3}$ |       |       |       |                       |
|                                     | $\alpha_{ba}$ ( $\mu\text{m.mHz}$ )                                                    | $-2.81 \times 10^{-3}$ | $3.91 \times 10^{-3}$ | 0.987 | 0.978 | 0.013 | $2.3 \times 10^{-4}$  |
|                                     | $a\Pi\sigma_y$ ( $\times 10^{-16}$ mHz J <sup>2</sup> /m <sup>6</sup> s <sup>2</sup> ) | $-7.35 \times 10^{-5}$ | $2.98 \times 10^{-2}$ |       |       |       |                       |
| MLRM with interaction terms, $BM_5$ | <b>Intercept</b> ( $\mu\text{m}^{(n-1)}\text{min}^{-1}$ )                              | $4.26 \times 10^{-2}$  | $6.40 \times 10^{-2}$ |       |       |       |                       |
|                                     | $a$ (mHz)                                                                              | $1.25 \times 10^{-2}$  | $1.32 \times 10^{-3}$ |       |       |       |                       |
|                                     | $\sigma_b^{\max} a$ (GPa.mHz)                                                          | $2.18 \times 10^{-3}$  | $1.33 \times 10^{-2}$ | 0.999 | 0.997 | 0.001 | $1.06 \times 10^{-4}$ |
|                                     | $\alpha_{ba}$ ( $\mu\text{m.mHz}$ )                                                    | $-1.91 \times 10^{-3}$ | $4.16 \times 10^{-3}$ |       |       |       |                       |
|                                     | $a\Pi\sigma_y$ ( $\times 10^{-16}$ mHz J <sup>2</sup> /m <sup>6</sup> s <sup>2</sup> ) | $-1.45 \times 10^{-4}$ | $2.70 \times 10^{-3}$ |       |       |       |                       |

<sup>a</sup>Statistically insignificant ( $p$ -value > 0.01) parameters are **bolded**.  $\Pi\sigma_y$  is treated as a single parameter as  $\sigma_y$  is a constant.

<sup>b</sup>The coefficients have the units that make the MLRM equation dimensionally homogeneous.

## S1. Sample MATLAB code for the microhydrodynamic calculations

### Main.m

```
global Pw      % Power applied to the stirrer per unit volume, W/(m^3)
global Db      % Milling bead diameter, m
global c       % solids volumetric concentration
global g0      % radial distribution function
global k       % restitution coefficient for bead-bead collisions
global Rdiss0  % dissipation coefficient taking into account squeezing the liquid film
global ub      % average particle oscillation velocity, m/s
global v       % frequency of the single bead oscillation, 1/s
global Em      % non-dimensional particle-particle gap thickness at which the lubrication force stops continuous
              % increase and becomes a constant
global visliq  % dynamic viscosity of the equivalent liquid to be measured from viscometer, kg/ms
global dliq    % density of the equivalent liquid, kg/(m^3)
global dbeads  % density of the media beads, kg/(m^3)
global K       % empirical correlation coefficient for correction for large Reynolds numbers
global Eht     % granular energy balance for a well-mixed slurry in the mill
global Rb      % m radius of bead
global etab    % Poisson ratio of the bead
global Yb      % Young modulus of the bead
global Rp      % radius of the particle
global eps     % volume fraction of the drug in the suspension
global Ystar   % reduced elastic modulus of the beads
global Yp      % Young modulus of the particle
global etap    % Poisson ratio of the particle
global gamma
global clim    % maximum bead concentration
```

```
y0=[1e-6]; % case with 1 unknown, 1 equation, the initial guess was gotten from Eskin's paper at 3200rpm
```

```
% Solver based on medium scale Gauss-Newton optimization with quadcubic line search
```

```
% Do NOT change the solver parameters below:
```

```
options=optimset('Diagnostics','on','Display','iter','Largescale','off','TolX',[1e-6],'TolFun',[1e-10],...
'MaxIter',[2e4],'MaxFunEvals',[2e4],'TolCon',[1e-10],'DiffMaxChange',[1e-8],'DiffMinChange',[1e-10]);
[y,fval,exitflag,output]=fsolve(@Equationset,y0,options);
```

```
% y(1) is equal to the granular temperature theta
```

```
ub=sqrt((8/pi)*y(1)); %m/s
```

```
V=((24*c*g0)/Db)*sqrt(y(1)/pi); %Hz
```

```
v=V/1000 ; %KHz
```

```

Fbn=1.96*(Yb/(1-etab^2))^(2/5)*(dbeads^(3/5))*(Rb^2)*(y(1)^(3/5));
Alphab=(0.75*(1-etab^2)/Yb*Rb*Fbn)^(1/3); %m
alphab=Alphab*10^6 ; %micrometer
sigmabmax=3*Fbn/(2*pi*(Alphab)^2)/10^9; %GPa
p=0.97*c/(1-c)*((dbeads*(1-etab^2)/Yb)^(2/5))*(y(1)^(2/5))*Rp/Rb;
A=p*V; %Hz
a=A*1000; %mHz
pisigmaA=2.23*(c^2)*2*g0/((pi^(5/2))*eps);
pisigmaB=(Yb/(1-etab^2))^(18/15);
pisigmaC=((Ystar/Yp)^gamma);
pisigmaD=(dbeads^(4/5))/Rb^2*(y(1)^(13/10));
pisigma=2.23*(c^2)*2*g0/((pi^(5/2))*eps)*((Yb/(1-
etab^2))^(18/15))*((Ystar/Yp)^gamma)*(dbeads^(4/5))*Rp/Rb^2*(y(1)^(13/10)); %(J2/m6.s)
granulartemperature=y; %m2/s2

```

% END OF MAIN PROGRAM %

```

g0
granulartemperature %m2/s2
ub %m/s
v %KHz
sigmabmax %GPa
alphab %(micrometer)
a %mHz
pisigma %J2/m6.s)
format shortg
Result=[g0; y(1); ub; v; sigmabmax; alphab; a; pisigma]

```

### Equationset.m

```

global Pw      % Power applied to the stirrer per unit volume, W/(m^3)
global Db      % Milling bead diameter, m
global c       % solids volumetric concentration
global g0      % radial distribution function
global k       % restitution coefficient for bead-bead collisions
global Rdiss0  % dissipation coefficient taking into account squeezing the liquid film
global ub      % average particle oscillation velocity, m/s
global v       % frequency of the single bead oscillation, 1/s
global Em      % non-dimensional particle-particle gap thickness at which the lubrication force stops continuous
increase and becomes a constant
global visliq  % dynamic viscosity of the equivalent liquid to be measured from viscometer, kg/ms
global dliq    % density of the equivalent liquid, kg/(m^3)
global dbeads  % density of the media beads, kg/(m^3)
global K       % empirical correlation coefficient for correction for large Reynolds numbers
global Eht     % granular energy balance for a well-mixed slurry in the mill
global Rb      %m radius pf bead
global etab    %Poisson ratio of the bead
global Yb      %Young modulus of the bead
global Rp      %radius of the particle 0min
global eps     %volume fraction of the drug in the suspension
global Ystar   %reduced elastic modulus of the beads
global Yp      %Young modulus of the particle
global etap    %Poisson ratio of the particle

```

```

global gamma
global clim %maximum bead concentration
Pw=822916.6667; % please get from data % Power applied to the stirrer per unit volume, W/(m^3)
Eht=0; % please get from data % granular energy balance for a well-mixed slurry in the mill
%other parameters
c= 0.55;% please get from data % solids volumetric concentration i.e (50 ml bead powder *void fraction)/total volume
of chamber
k= 0.76; % particle-particle restitution coef. ref. Tatsumi see coefficient of restitution paper 0.76 for YSZ, 0.9 for CPS
Em=0.003; % non-dimesnional particle-particle gap thickness
visliq=0.048390987;%kg/(m·s) Please measure for each sample
dliq= 1026; %kg/(m^3) Please measure for each sample
dbeads=6000;%kg/(m^3)% measured
Db= 0.000405; %m please include the diameter of the bead with different sizes.
Rb= Db/2; %m radius of the bead
etab=0.2; %poisson ratio of the bead (0.2 for YSZ 0.33 for CPS)
Yb=200*10^9; %Pa Young modulus of the bead (200 GPa for YSZ, 1.5 GPa for CPS)
Rp=13.723*10^-6; %0 min (m)radius of the particle
eps=0.07444882; %volume fraction of the drug in the suspension
Ystar=((1-etab^2)/Yb+(1-etap^2)/Yp)^(-1); %reduced elastic modulus of the beads
Yp=8.93*10^9; %Pa Young modulus of the particle
etap=0.3; %Poisson ratio of the particle
gamma=1/3;
clim=0.63;
% calculate the emprical correlation coefficient
K=(0.096+0.142*c^0.212)/((1-c)^4.454);

%Calculate the radial distribution function
g0=(1-(c/clim)^(1/3))^(-1)

% Dissipation Coefficient
Rdiss0=1+3*((0.5*c)^0.5)+(135/64)*c*log(c)+11.26*c*(1-5.1*c+16.57*(c^2)-21.77*(c^3))-log(Em)*g0*c;
Re=Db*dliq*(y(1)^0.5)/visliq;

Rdiss=Rdiss0+Re*K;
nb=6*c/(pi*(Db^3));
epsvis= 9*pi*visliq*Db*nb*y(1)*Rdiss;
epscoll=(12/(Db*sqrt(pi)))*(1-(k^2))*(c^2)*dbeads*g0*(y(1)^1.5);
func(1)=Pw-epsvis-epscoll-Eht;

```

## S2. R code for the subset selection algorithm

```

for (i in c(1:4)) {
  print(paste("running variable", i))
  bestAdjR=0
  bestRSS=Inf
  regnames=combn(colnames(data),!(names(data) %in% c('k'))),i)
  for (j in c(1:length(regnames[1,]))) {
    model=paste0("k~",paste("0",paste(regnames[j],collapse="+"),sep = "+"))
    #model=paste0("k~",paste(regnames[j],collapse="+"))
    fit=lm(as.formula(model),data = data)
    adjR=summary(fit)$adj.r.squared
    RSS=anova(fit)["Residuals", "Sum Sq"]
  }
}

```

```
R2=summary(fit)$r.squared
Pvalue=summary(fit)$coefficients[,4]
Pmodel=lmpr(fit)
if (adjR>=bestAdjR) {
  bestAdjR=adjR
  bestRSS=RSS
  bestModel=model
  bestR2=R2
  bestcoef=coef(fit)
  bestPvalue=Pvalue
  bestfit=fit
  bestPmodel=Pmodel
}

}

print("best model")
print("best coef")
print(formatC(bestcoef, format="e", digits = 2))
print("best Pvalue")
print(formatC(bestPvalue, format="e", digits = 2))
print("Best R2")
print(bestR2)
print("adj r")
print(bestAdjR)
print("bestRSS")
print(bestRSS)
print("bestPmodel")
print(formatC(bestPmodel, format="e", digits = 2))

}
```
